# Supplementary material
Source: publisher site journal article supplement (https://study.sagepub.com/sites/default/files/phillips_kelly_2e_appendix_3.doc)
Supplement: Supplementary file 1 [file phillips_kelly_2e_appendix_3.doc]

Appendix 3 Example of Table of Summary of Results for a report (Actual tests will vary)

| **SUMMARY OF RESULTS** | | | | | | | |
| --- | --- | --- | --- | --- | --- | --- | --- |
| Name of Test | SS | 95% CI | | | Descriptor | | |
| **Attainments in Literacy** | | | | | | | |
| **Wide Range Achievement Test 5 (WRAT 5) Green Form** | | | Single Word Reading |  | |  |  |
|  | | | Single Word Spelling |  | |  |  |
| **York Assessment of Reading for Comprehension (YARC) Passage Reading** | | | Single Word |  | |  |  |
|  | | | Accuracy |  | |  |  |
|  | | | Rate |  | |  |  |
|  | | | Comprehension |  | |  |  |
| **Detailed Assessment of Speed of Handwriting (DASH)** | | | Copy Best |  | |  |  |
|  | | | Copy Fast |  | |  |  |
|  | | | Alphabet |  | |  |  |
|  | | | Free Writing |  | |  |  |
|  | | | Total |  | |  |  |
| **Underlying Ability** | | | |  | |  |  |
| **Wide Range Intelligence Test (WRIT)** | | | Verbal Analogies |  | |  |  |
|  | | | Vocabulary |  | |  |  |
|  | | | **Verbal Composite** |  | |  |  |
|  | | | Matrices |  | |  |  |
|  | | | Diamonds |  | |  |  |
|  | | | **Visual Composite** |  | |  |  |
|  | | | **General Ability** |  | |  |  |
| **Cognitive Processing** | | | |  | |  |  |
| **Comprehensive Test of Phonological Processing 2 (CTOPP-2)** | | | Elision |  | |  |  |
|  | | | Blending Words |  | |  |  |
|  | | | Phoneme Isolation |  | |  |  |
|  | | | **Phonological Awareness** |  | |  |  |
|  | | | Memory for Digits |  | |  |  |
|  | | | Non-word Repetition |  | |  |  |
|  | | | **Phonological Memory** |  | |  |  |
|  | | | Digits |  | |  |  |
|  | | | Letters |  | |  |  |
|  | | | **Rapid Naming** |  | |  |  |
| **Test of Memory and Learning 2 (TOMAL 2)** | | | Digits Forwards |  | |  |  |
|  | | | Letters Forwards |  | |  |  |
|  | | | Manual Imitation |  | |  |  |
|  | | | Digits Backwards |  | |  |  |
|  | | | Letters Backwards |  | |  |  |
|  | | | **Attention and Concentration Index** |  | |  |  |
| Other relevant information e.g. Maths / Visual Motor Integration | | |  |  | |  |  |

**Photocopiable**

*Assessment of Learners with Dyslexic-Type Difficulties* 2e © 2018 Sylvia Phillips and Kathleen Kelly

(Sage: London).
